# Supplementary material
Source: Springer Nature journal article supplement (https://www.springermedizin.de/resource/supplementary/12950_2013_362_MOESM7_ESM.pdf/9557662)

|                           | 15 min |   |   |   |   | 30 min |   |   |   |   | 60 min |   |   |   |   | 120 min |   |   |   |   | 120 min |   |
|---------------------------|--------|---|---|---|---|--------|---|---|---|---|--------|---|---|---|---|---------|---|---|---|---|---------|---|
| Hsp70                     | -      | + | - | + | - | -      | + | - | + | - | -      | + | - | + | - | -       | + | - | + | - | -       | - |
| LPS                       | -      | - | + | + | - | -      | - | + | + | - | -      | - | + | + | - | -       | - | + | + | - | +       | + |
| HS                        | -      | - | - | - | + | -      | - | - | - | + | -      | - | - | - | + | -       | - | - | - | + | -       | - |
| Cold NF- $\kappa$ B probe | -      | - | - | - | - | -      | - | - | - | - | -      | - | - | - | - | -       | - | - | - | - | +       | - |
| Cold irrelevant probe     | -      | - | - | - | - | -      | - | - | - | - | -      | - | - | - | - | -       | - | - | - | - | -       | + |

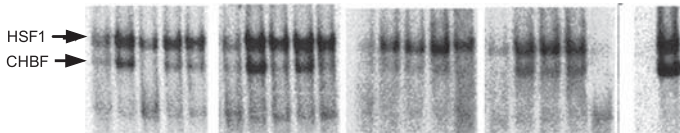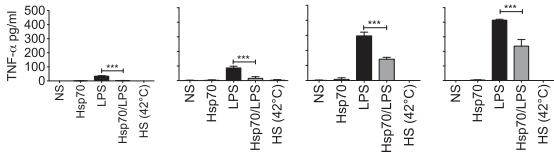

Supplement: MOESM7 [file 9557662]
